# Supplementary material for: Pan-cancer analysis of immune checkpoint receptors and ligands in various cells in the tumor immune microenvironment
Source: publisher site journal article supplement (doi:10.18632/aging.206053), 2024-08-07
Supplement: Supplementary file [file aging-v16i15-206053-supplementary-material-SD1.pdf]

**SUPPLEMENTARY FIGURES**

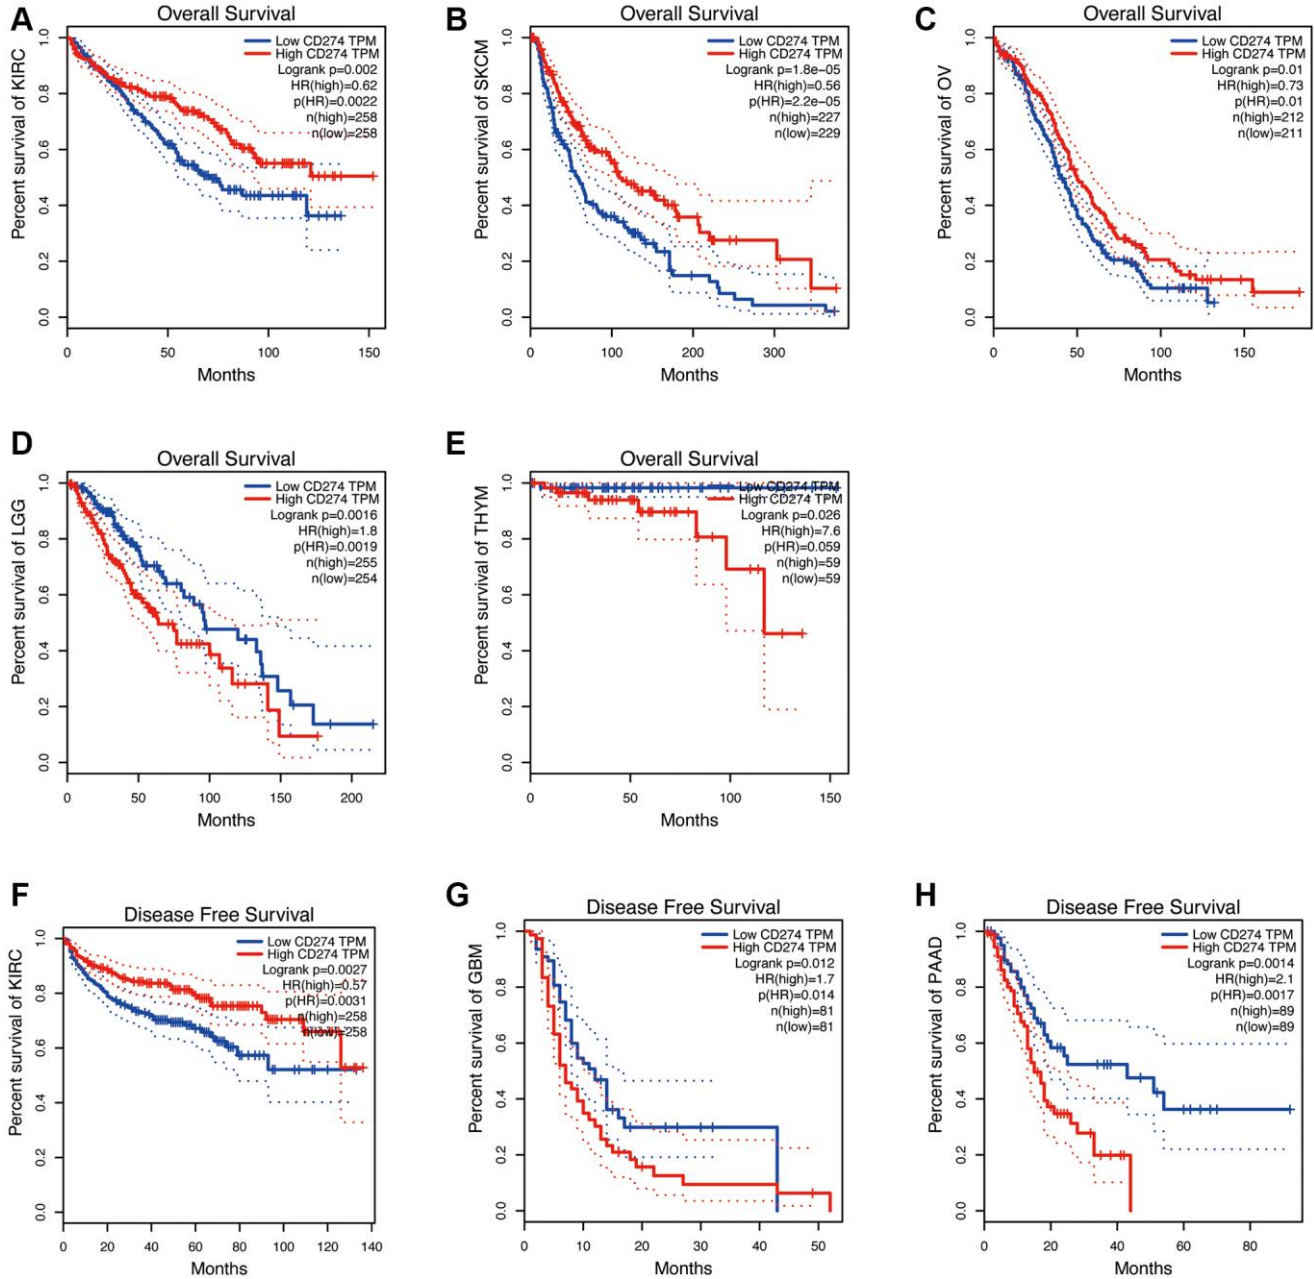

**Supplementary Figure 1. A significant correlation between PDL1 expression and pan-cancer prognostic value.** Expression of PDL1 was associated with overall survival (OS) in KIRC (A), SKCM (B), OV (C), LGG (D), THYM (E), and progression free survival (PFS) in KIRC (F), GBM (G), PAAD (H).

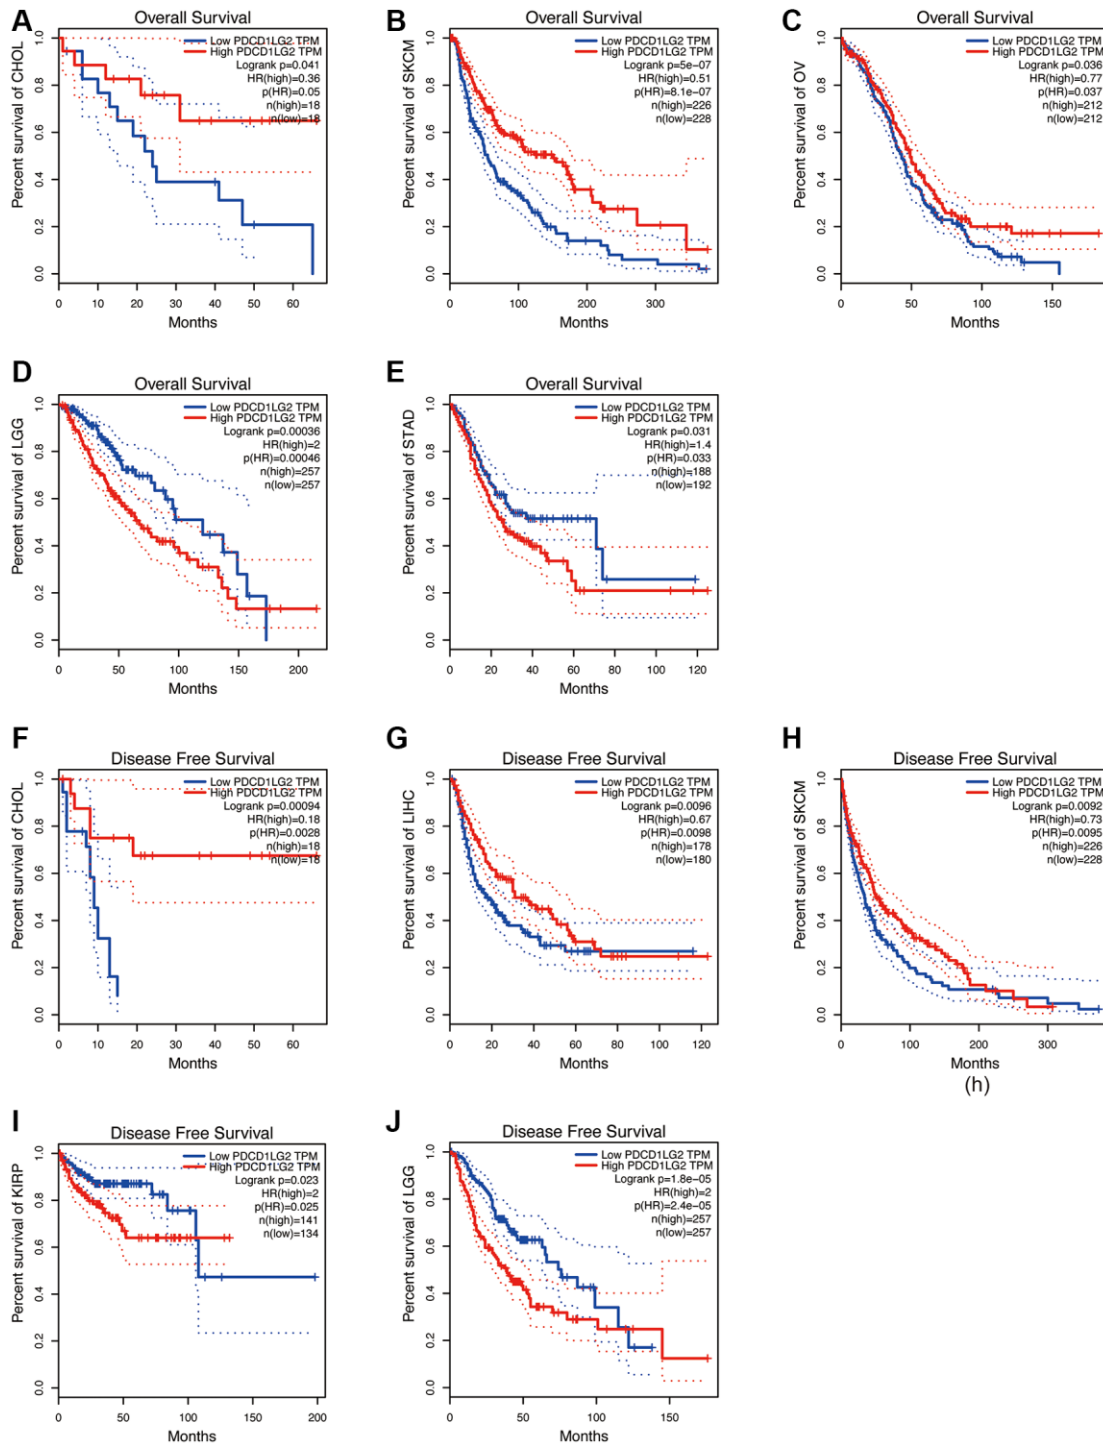

**Supplementary Figure 2. A significant correlation between PDL2 expression and pan-cancer prognostic value.** Expression of PDL2 was associated with overall survival (OS) in CHOL (A), SKCM (B), OV (C), LGG (D), STAD (E), and progression free survival (PFS) in CHOL (F), LIHC (G), SKCM (H), KIRP (I), LGG (J).

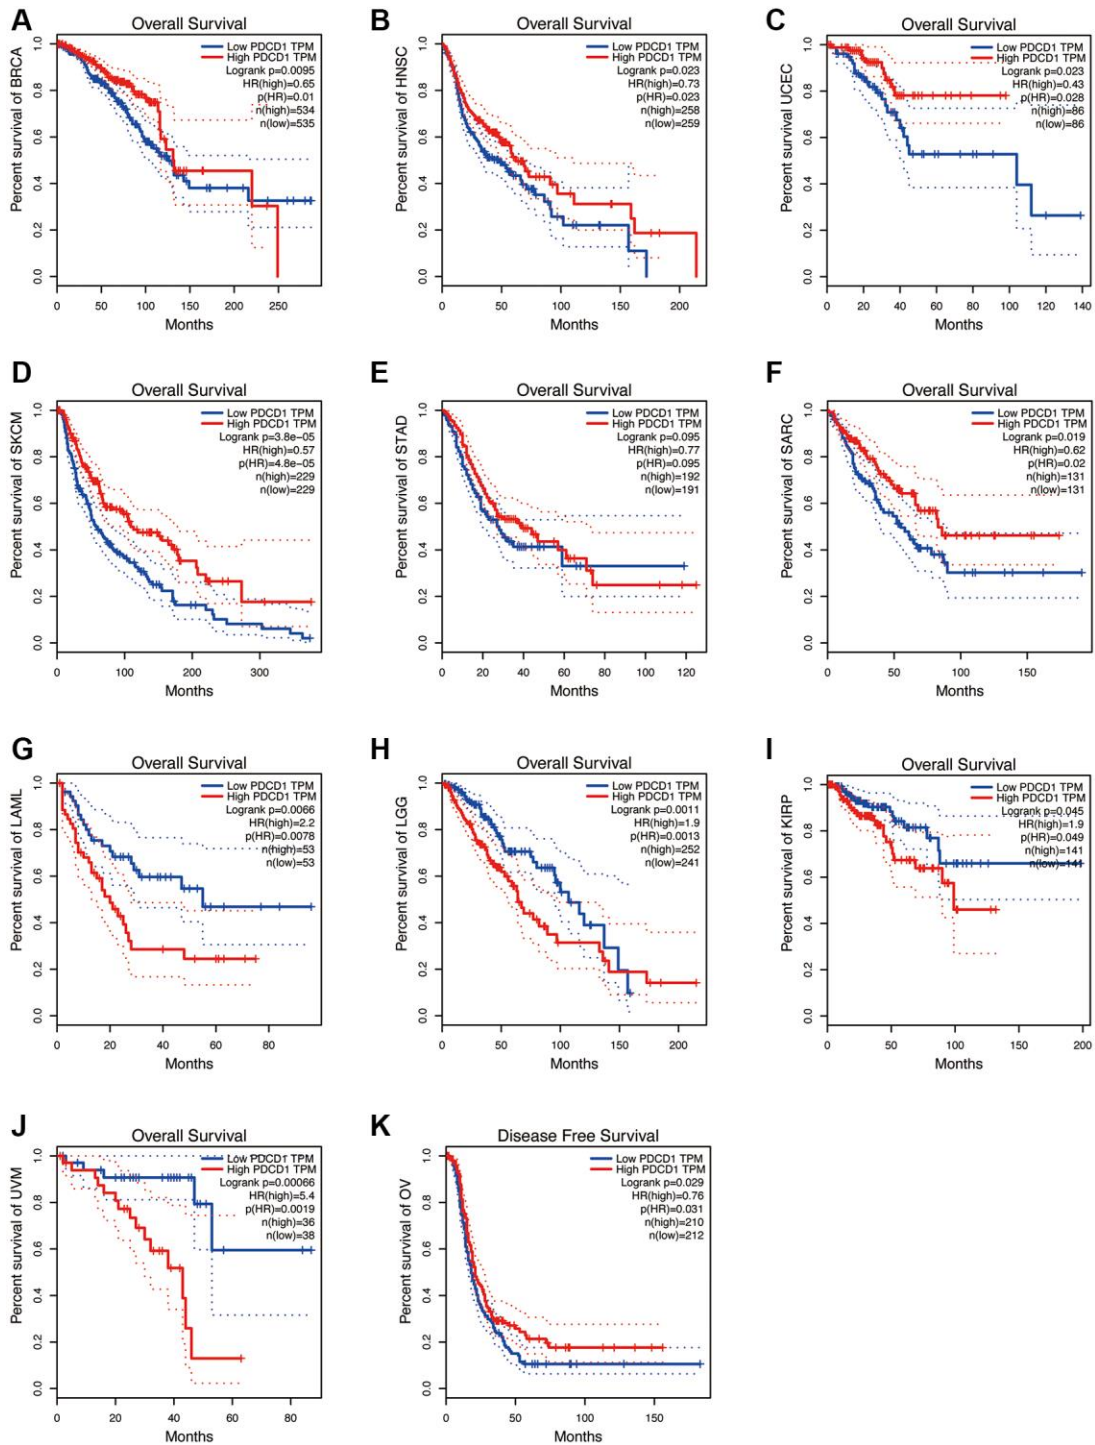

**Supplementary Figure 3. A significant correlation between PD1 expression and pan-cancer prognostic value.** Expression of PD1 was associated with overall survival (OS) in BRCA (A), HNSC (B), UCEC (C), SKCM (D), STAD (E), SARC (F), LAML (G), LGG (H), KIRP (I), UVM (J) and progression free survival (PFS) in OV (K).

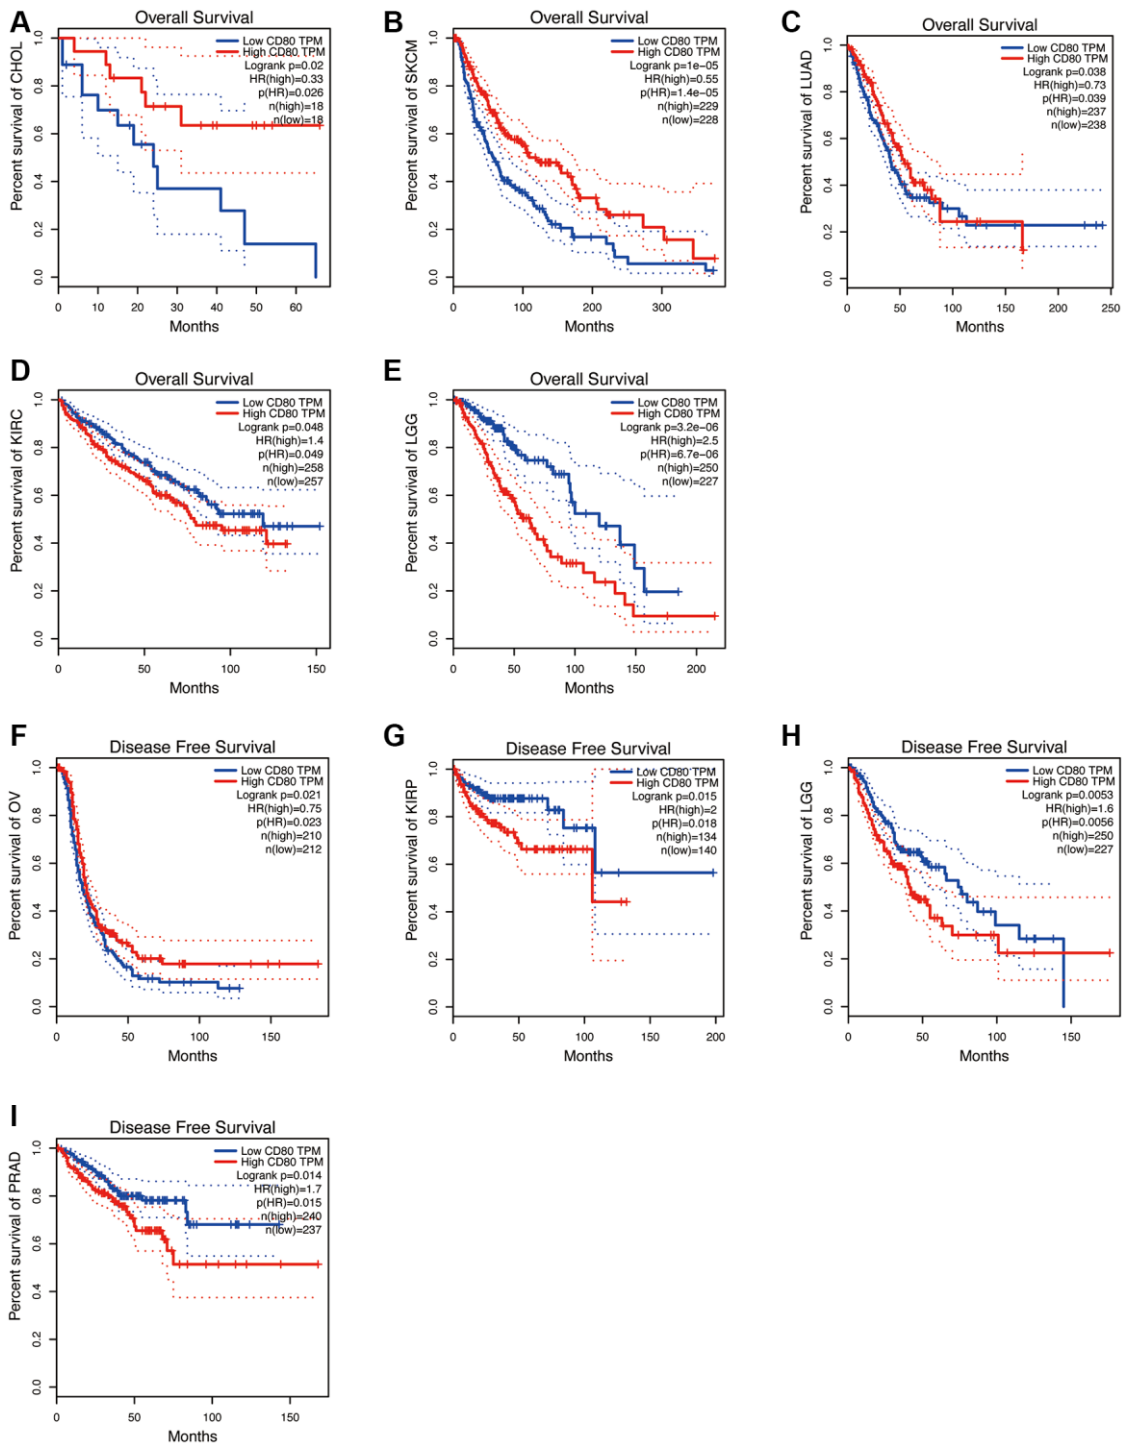

**Supplementary Figure 4. A significant correlation between CD80 expression and pan-cancer prognostic value.** Expression of CD80 was associated with overall survival (OS) in CHOL (A), SKCM (B), LUAD (C), KIRC (D), LGG (E), and progression free survival (PFS) in OV (F), KIRP (G), LGG (H), PRAD (I).

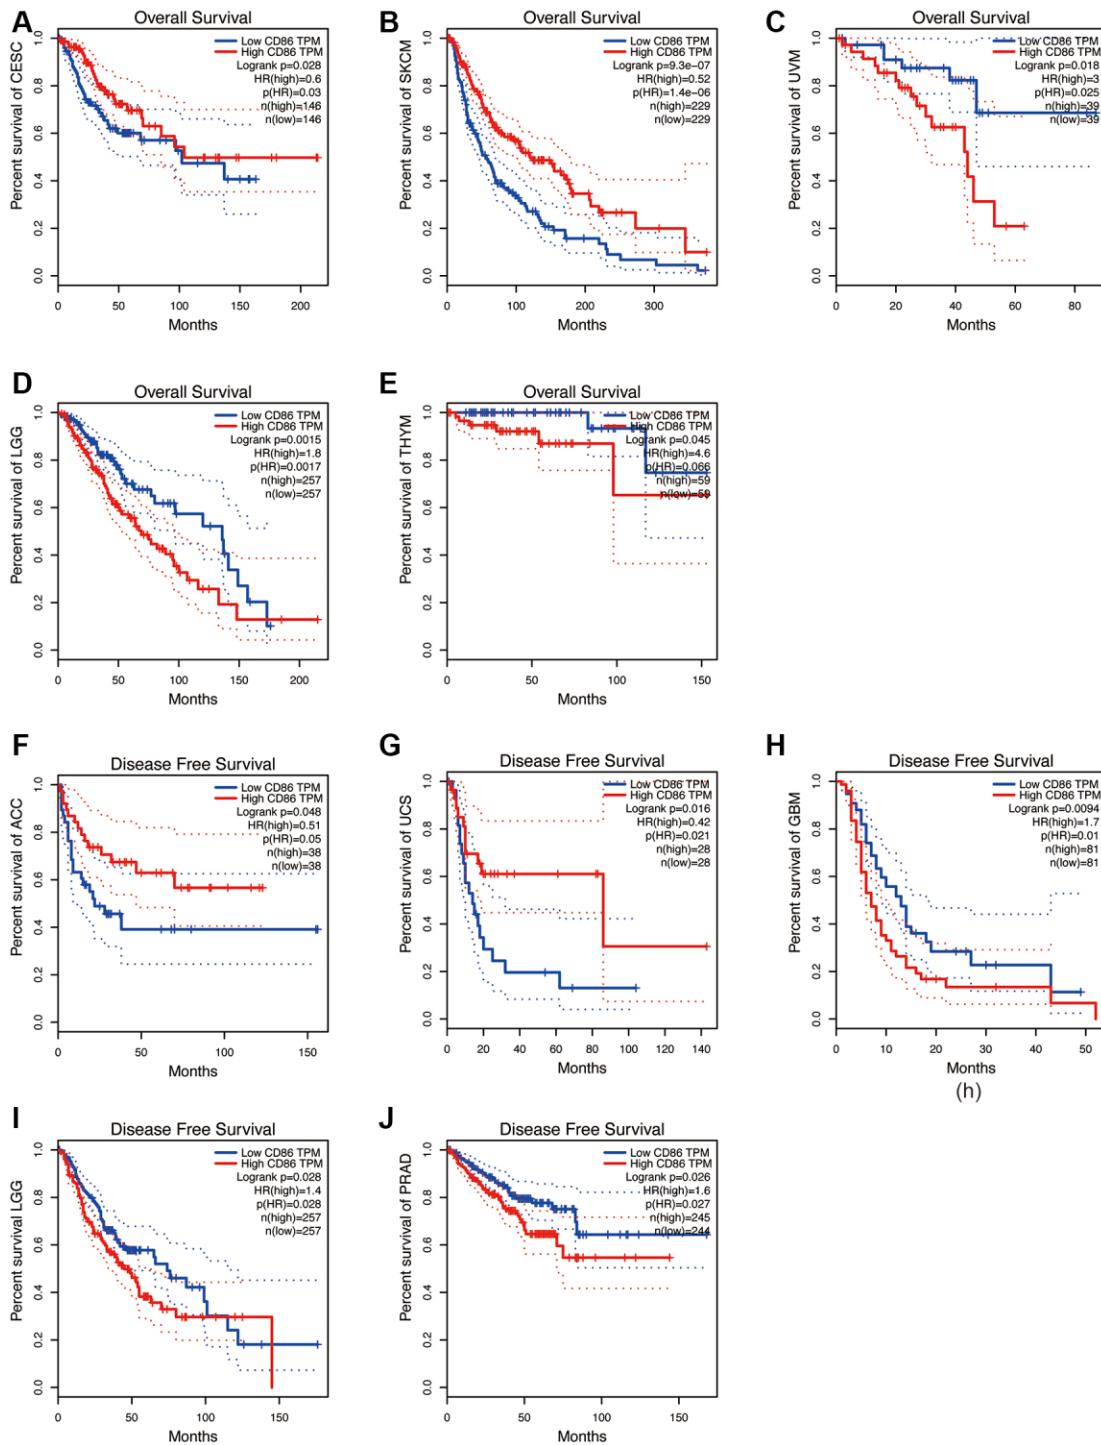

**Supplementary Figure 5. A significant correlation between CD86 expression and pan-cancer prognostic value.** Expression of CD86 was associated with overall survival (OS) in CESC (A), SKCM (B), UVM (C), LGG (D), THYM (E), and progression free survival (PFS) in ACC (F), UCS (G), GBM (H), LGG (I), PRAD (J).



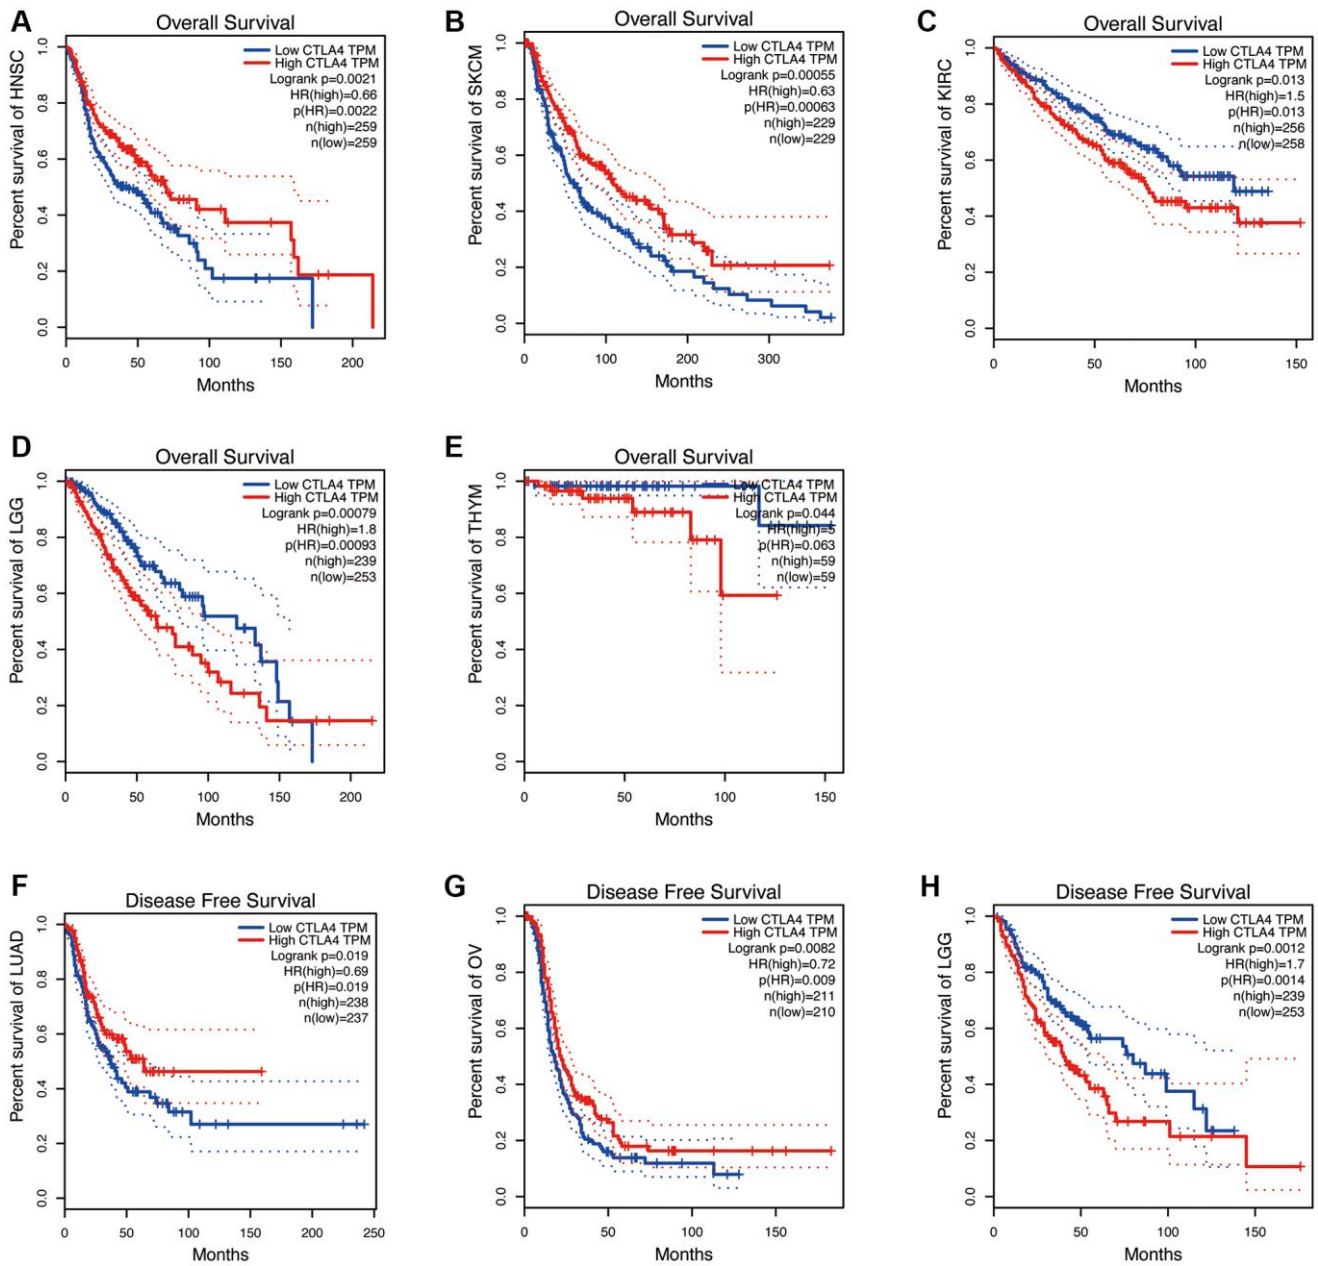

**Supplementary Figure 6. A significant correlation between CTLA4 expression and pan-cancer prognostic value.** Expression of CTLA4 was associated with overall survival (OS) in HNSC (A), SKCM (B), KIRC (C), LGG (D), THYM (E), and progression free survival (PFS) in LUAD (F), OV (G), LGG (H).

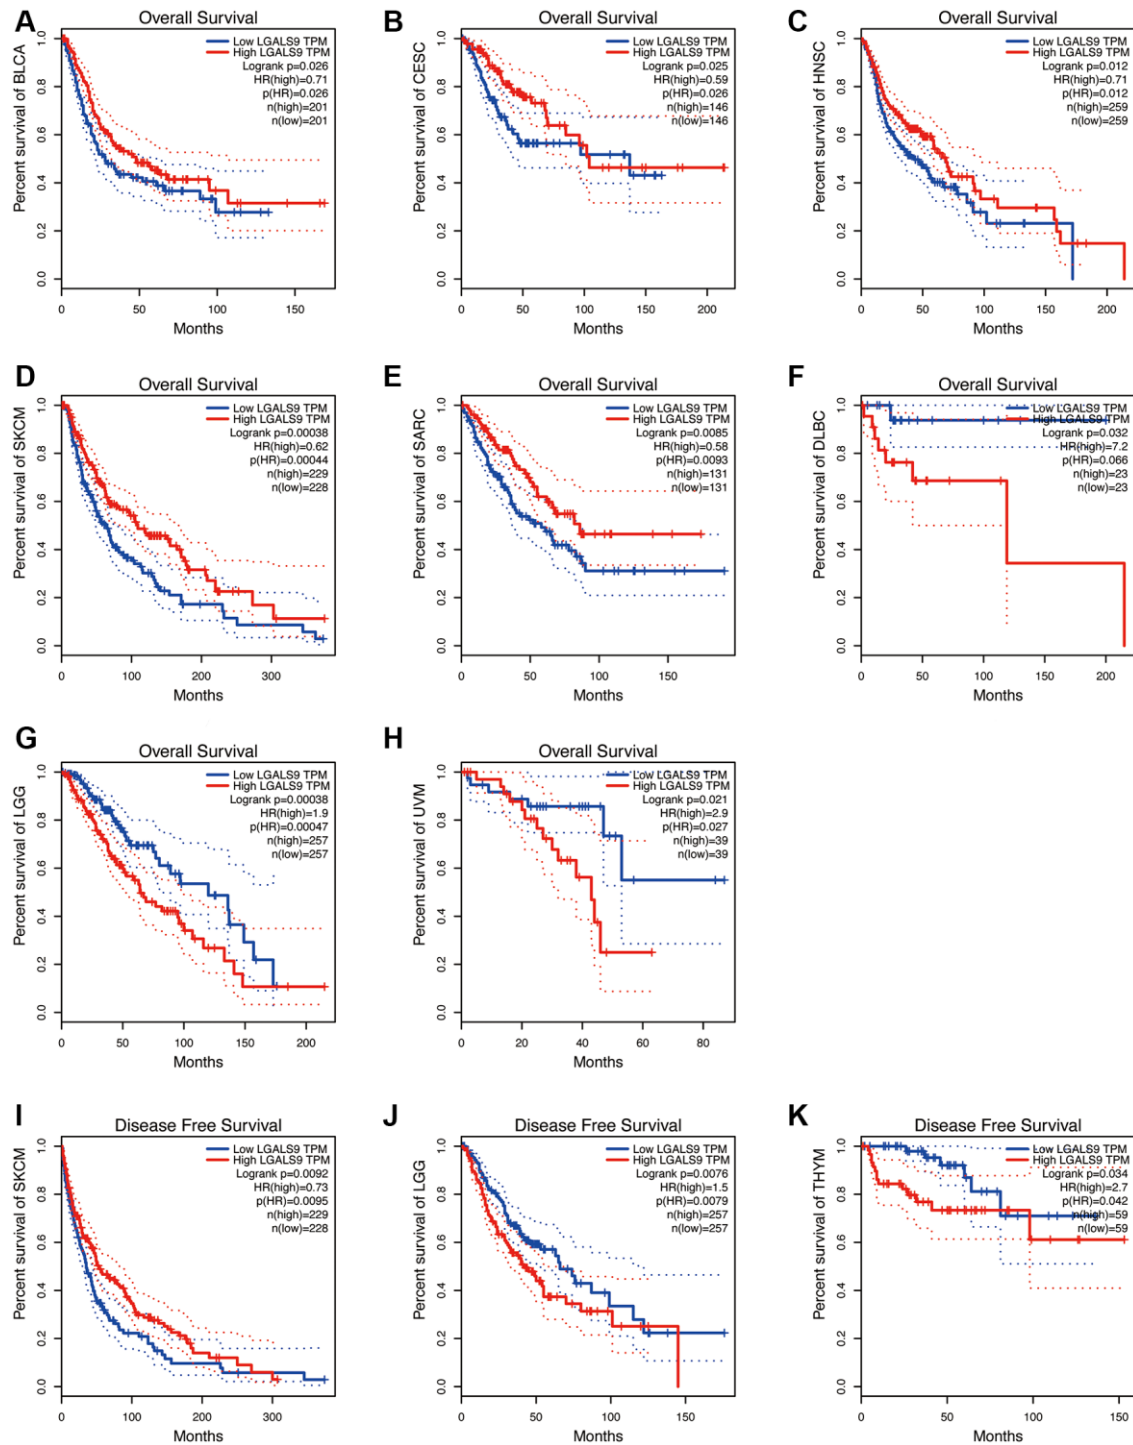

**Supplementary Figure 7. A significant correlation between CD86 expression and pan-cancer prognostic value.** Expression of CD86 was associated with overall survival (OS) in BLCA (A), CESC (B), HNSC (C), SKCM (D), SARC (E), DLBC (F) and progression free survival (PFS) in LGG (G), UVM (H), SKCM (I), LGG (J), THYM (K).

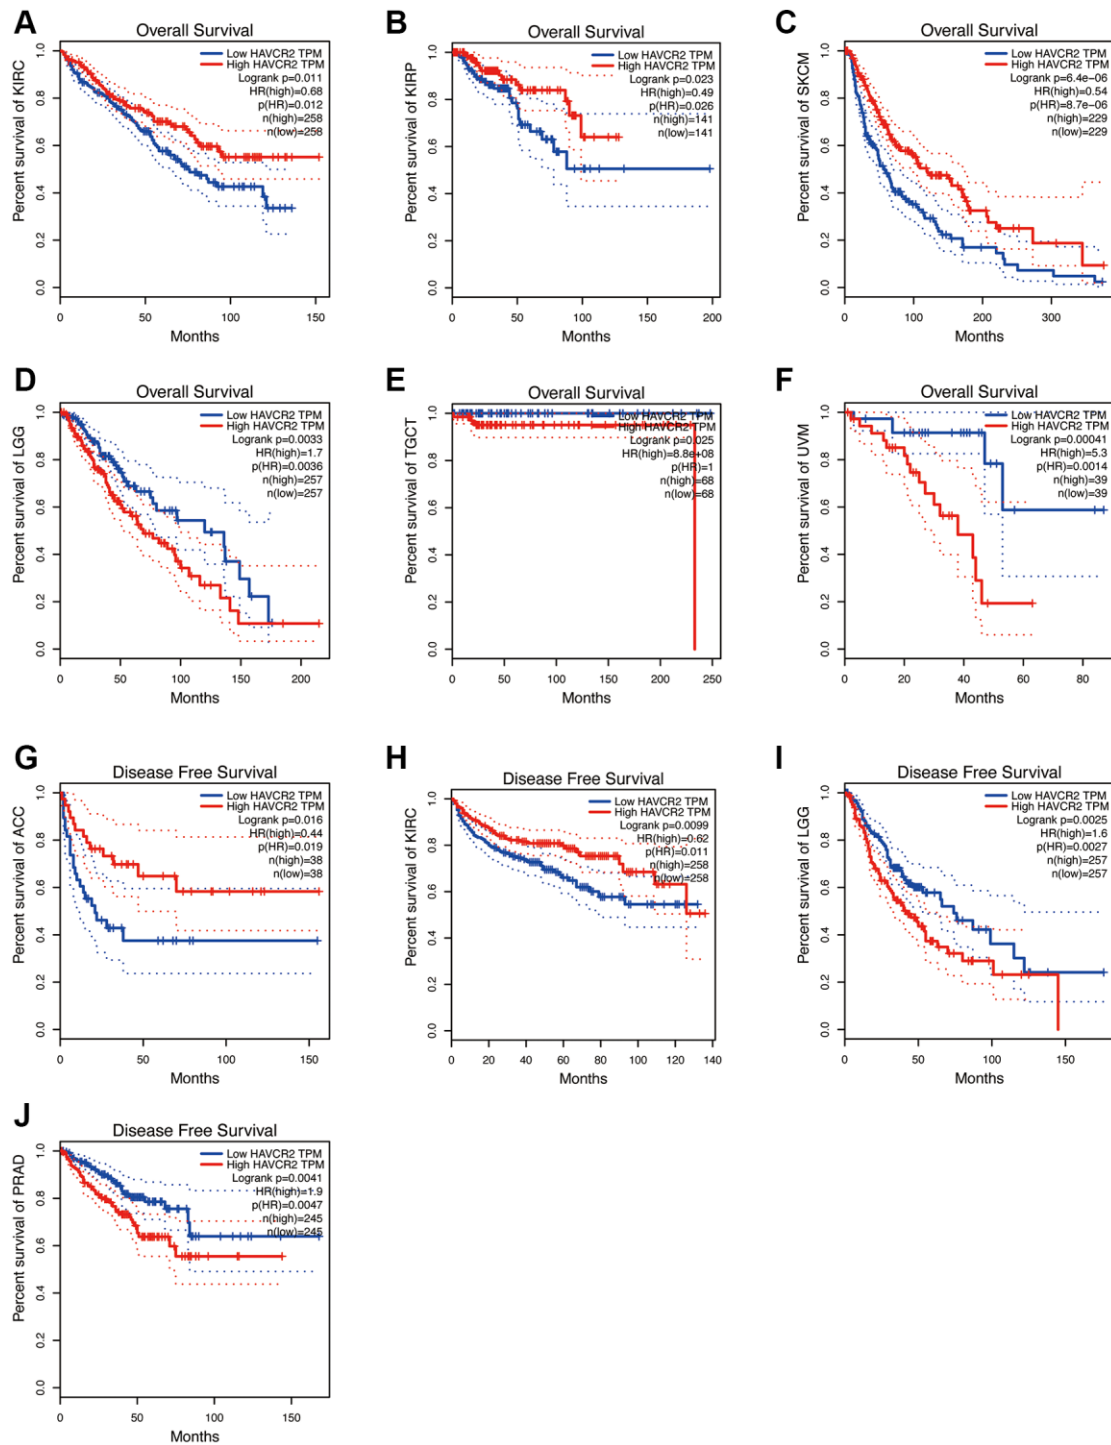

**Supplementary Figure 8. A significant correlation between HAVCR2 expression and pan-cancer prognostic value.** Expression of HAVCR2 was associated with overall survival (OS) in KIRC (A), KIRP (B), SKCM (C), LGG (D), TGCT (E), UVM (F) and progression free survival (PFS) in ACC (G), KIRC (H), LGG (I), PRAD (J).



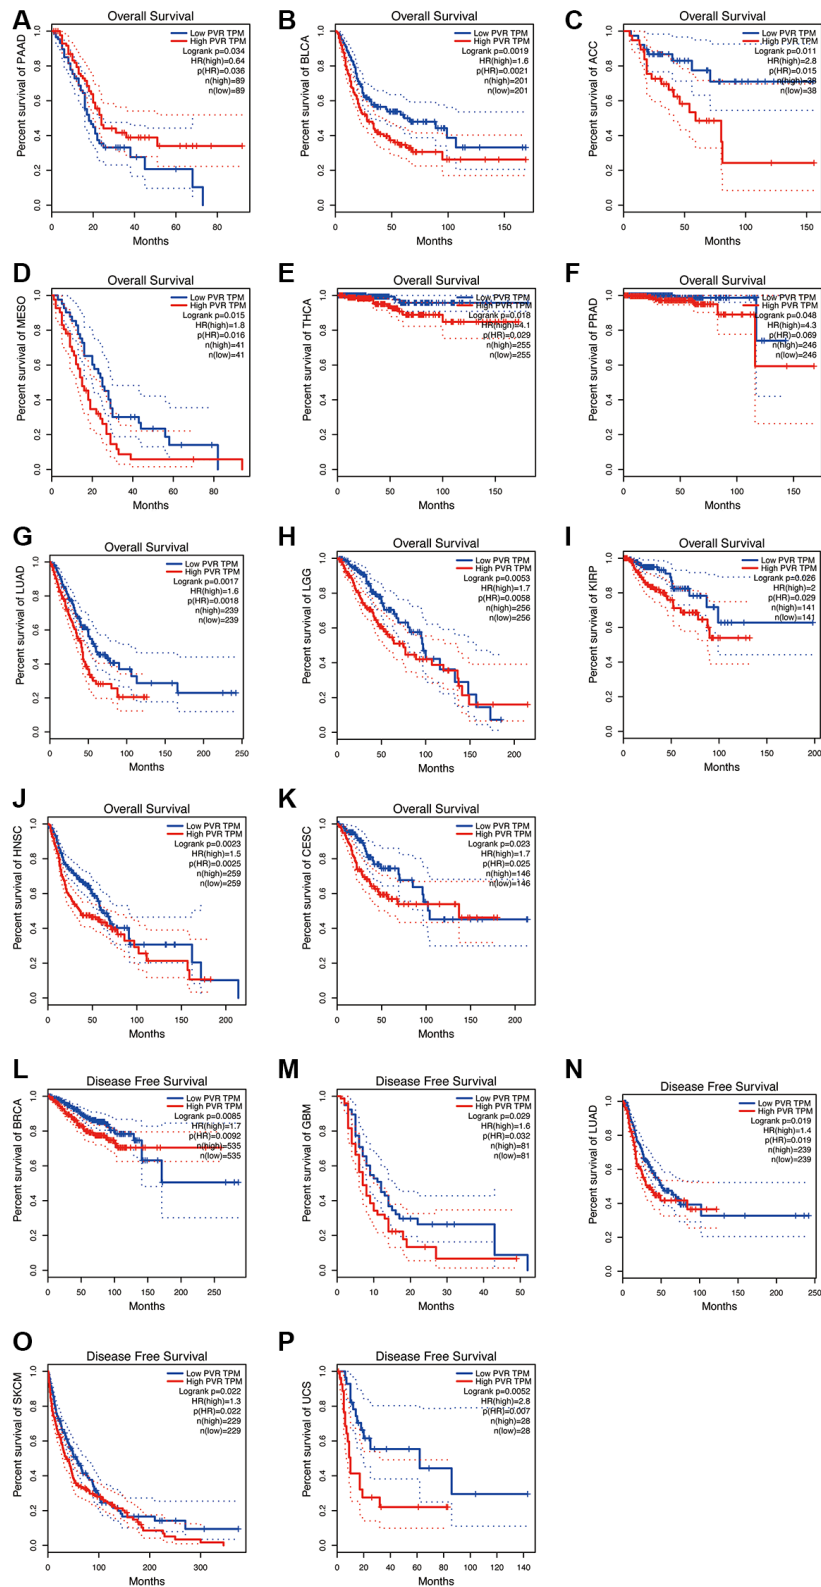

**Supplementary Figure 9. A significant correlation between PVR expression and pan-cancer prognostic value.** Expression of PVR was associated with overall survival (OS) in PAAD (A), BLCA (B), ACC (C), MESO (D), THCA (E), PRAD (F), LUAD (G), LGG (H), KIRP (I), HNSC (J), CESC (K) and progression free survival (PFS) in BRCA (L), GBM (M), LUAD (N), SKCM (O), UCS (P).

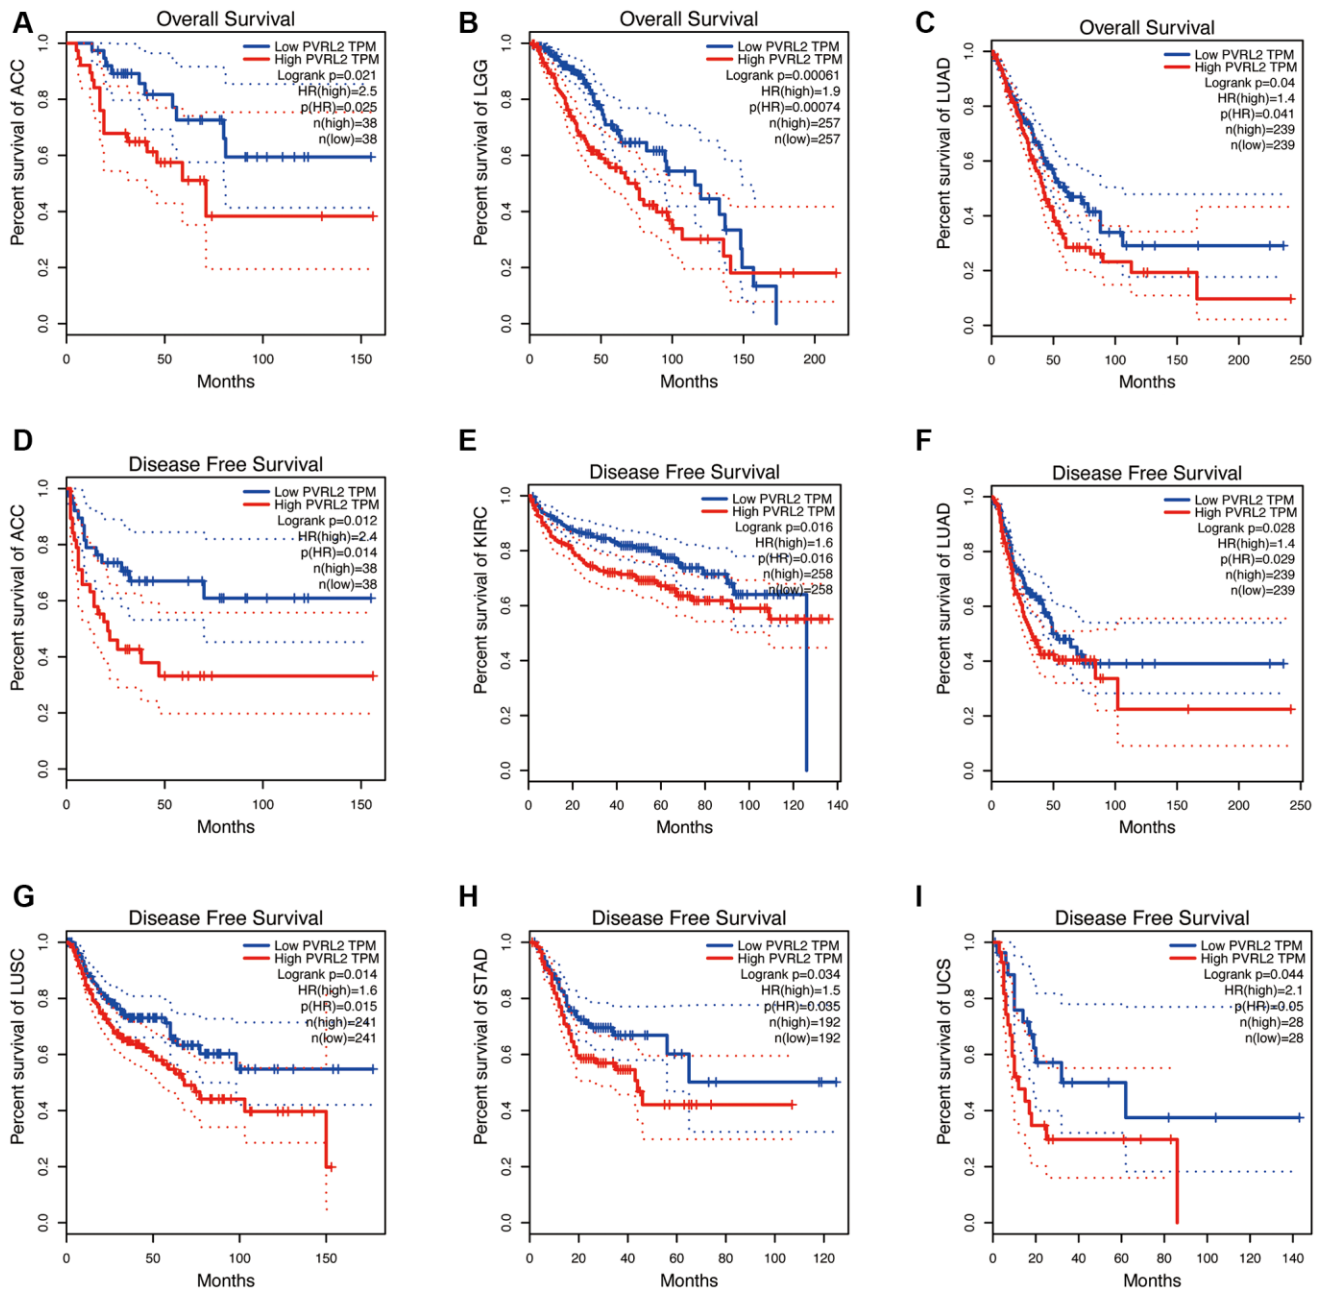

**Supplementary Figure 10. A significant correlation between NECTIN2 expression and pan-cancer prognostic value.** Expression of NECTIN2 was associated with overall survival (OS) in ACC (A), LGG (B), LUAD (C), and progression free survival (PFS) in ACC (D), KIRC (E), LUAD (F), LUSC (G), STAD (H), UCS (I).

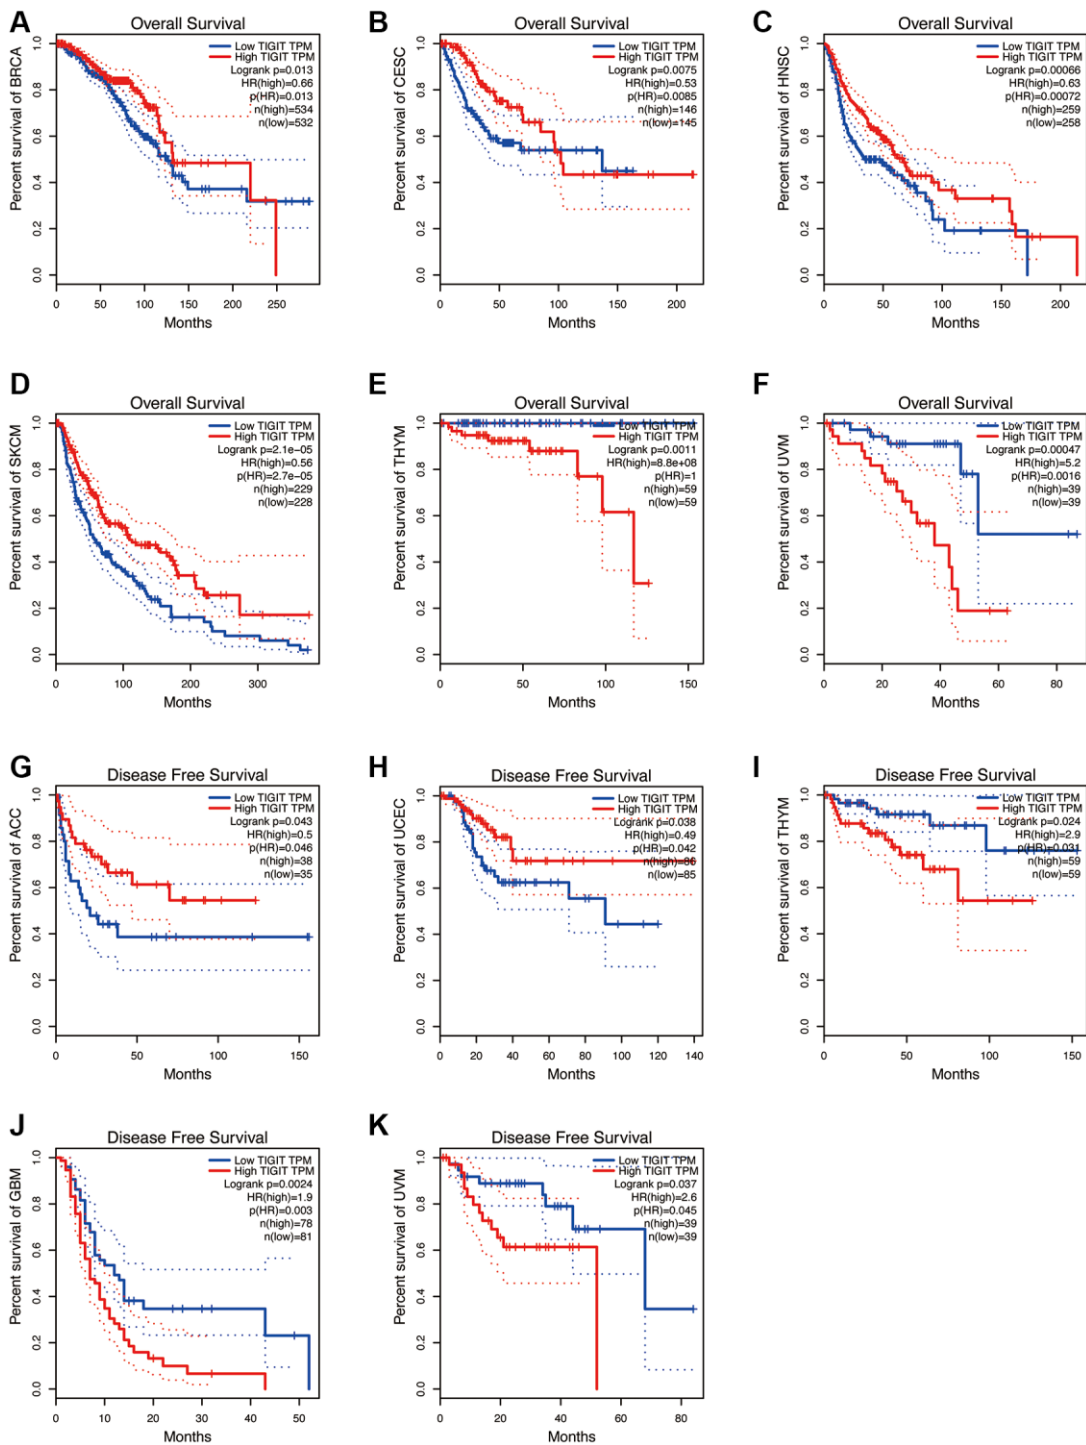

**Supplementary Figure 11. A significant correlation between TIGIT expression and pan-cancer prognostic value.** Expression of TIGIT was associated with overall survival (OS) in BRCA (A), CESC (B), HNSC (C), SKCM (D), THYM (E), UVM (F), and progression free survival (PFS) in ACC (G), UCEC (H), THYM (I), GBM (J), UVM (K).

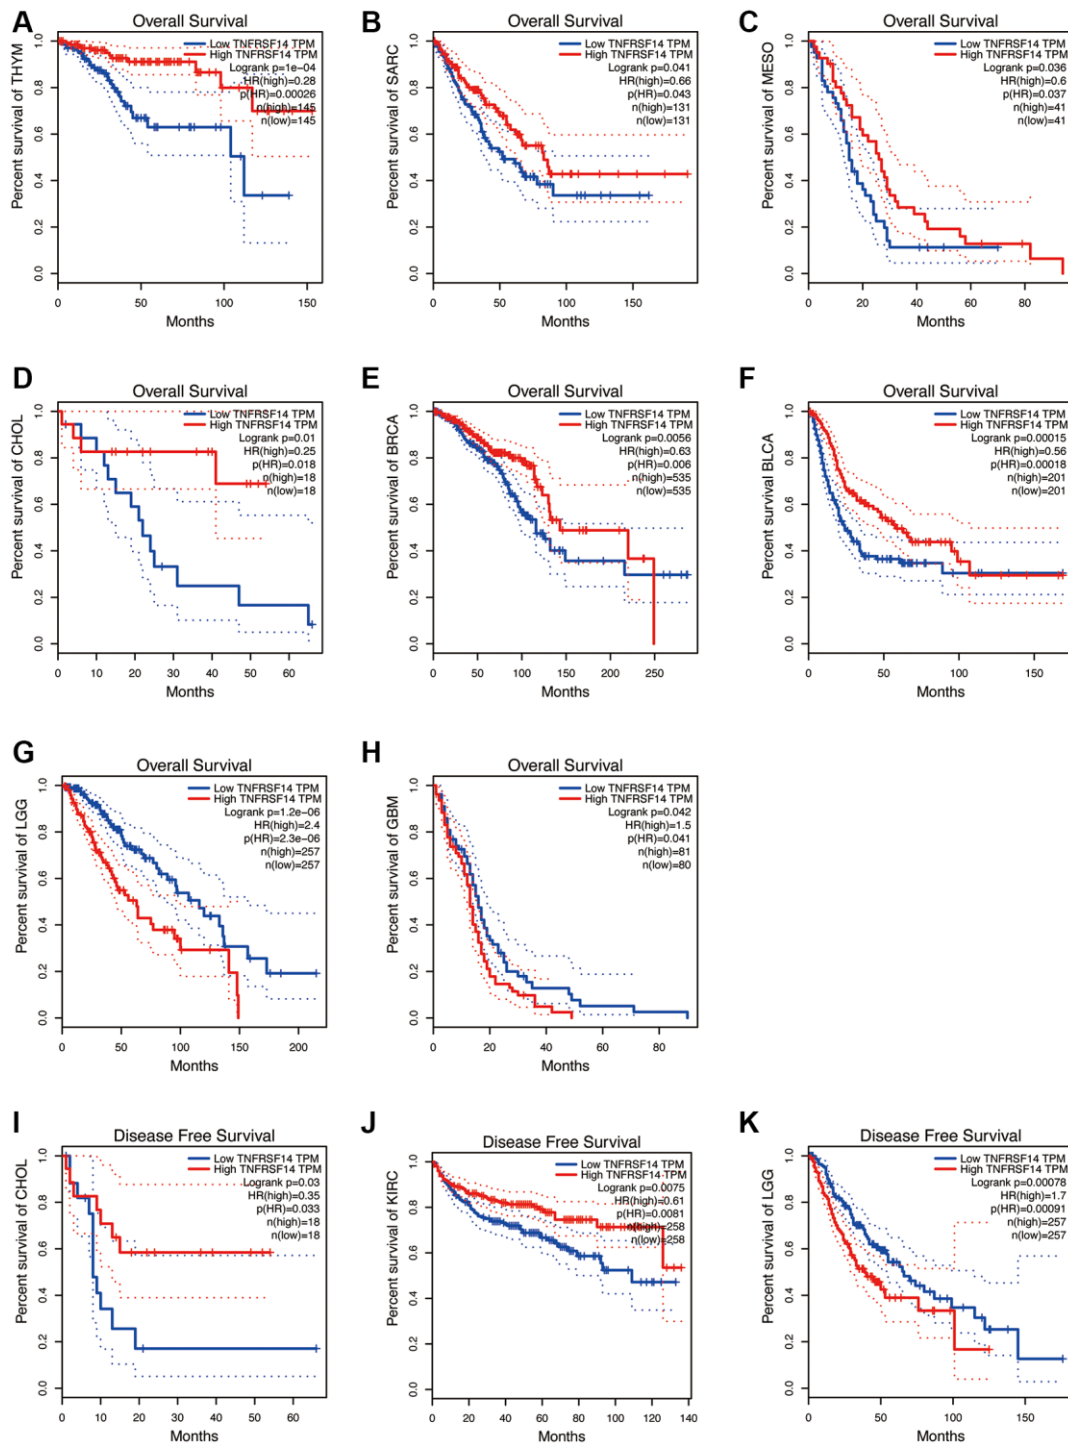

**Supplementary Figure 12. A significant correlation between TNFRSF14 expression and pan-cancer prognostic value.** Expression of TNFRSF14 was associated with overall survival (OS) in THYM (A), SARC (B), MESO (C), CHOL (D), BRCA (E), BLCA (F), LGG (G), GBM (H), and progression free survival (PFS) in CHOL (I), KIRC (J), LGG (K).

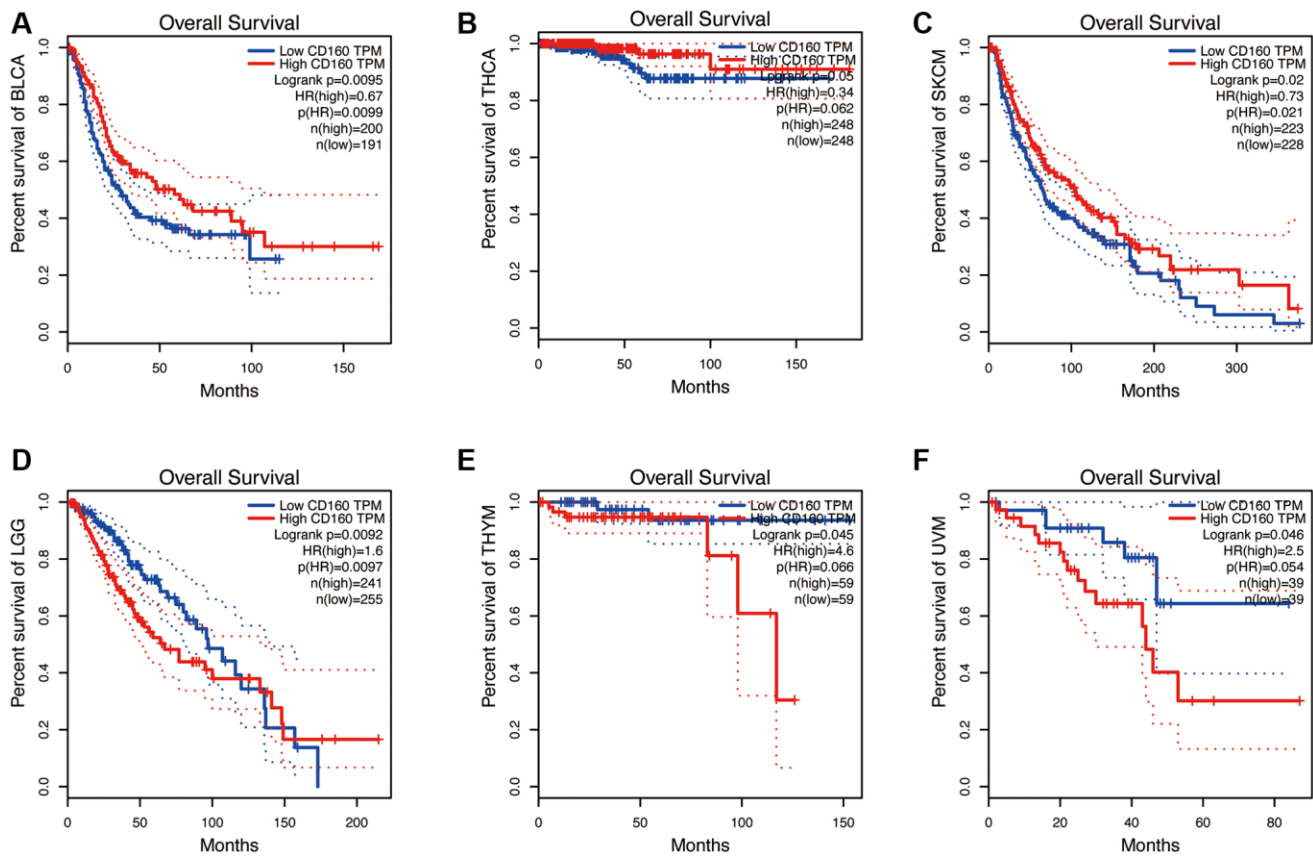

**Supplementary Figure 13. A significant correlation between CD160 expression and pan-cancer prognostic value.** Expression of CD160 was associated with overall survival (OS) in BLCA (A), THCA (B), SKCM (C), LGG (D), THYM (E), UVM (F).



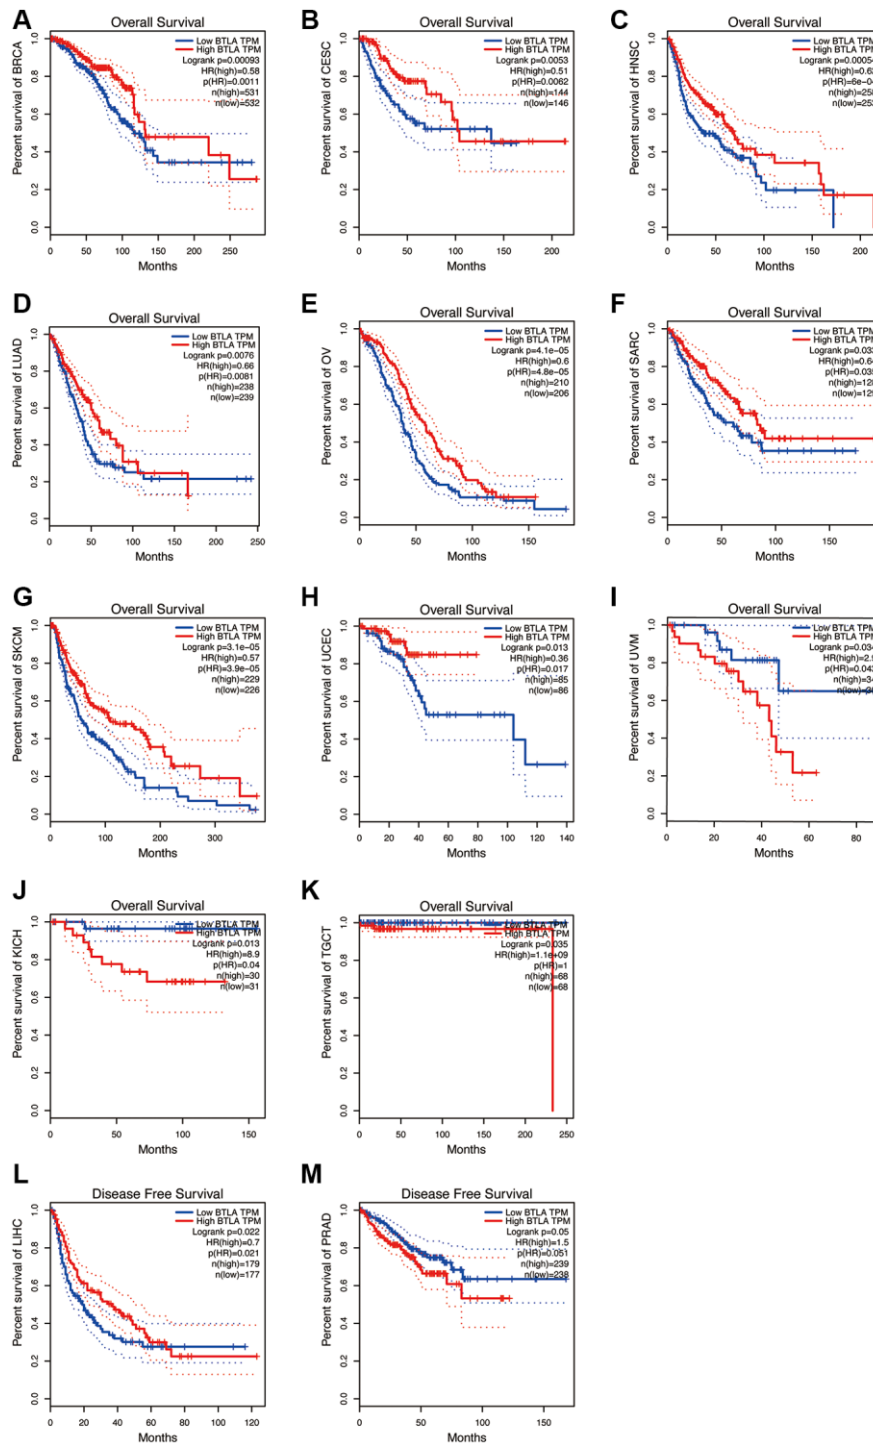

**Supplementary Figure 14. A significant correlation between BTLA expression and pan-cancer prognostic value.** Expression of BTLA was associated with overall survival (OS) in BRCA (A), CESC (B), HNSC (C), LUAD (D), OV (E), SARC (F), SKCM (G), UCEC (H), UVM (I), KICH (J), TGCT (K) and progression free survival (PFS) in LIHC (L), PRAD (M).

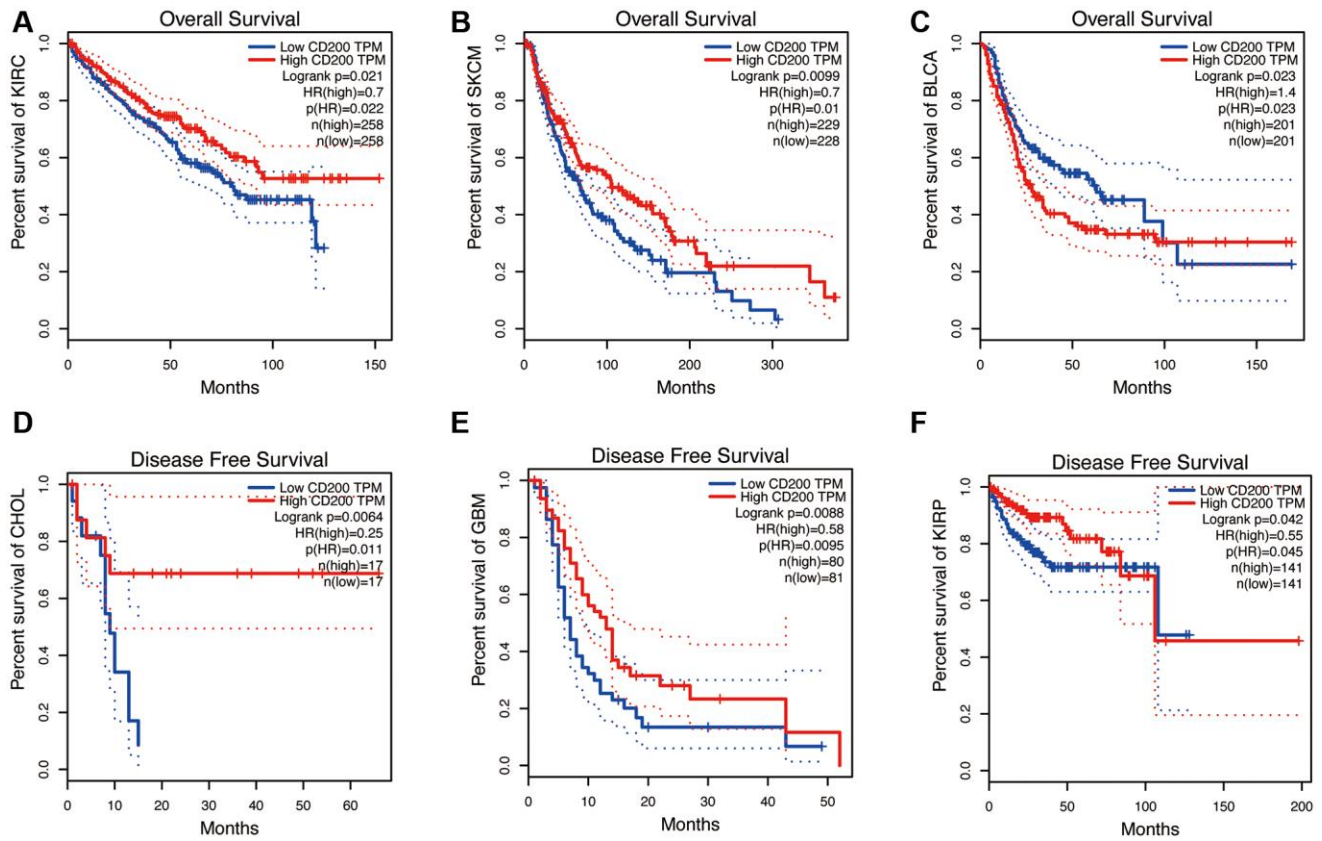

**Supplementary Figure 15. A significant correlation between CD200 expression and pan-cancer prognostic value.** Expression of CD200 was associated with overall survival (OS) in KIRC (A), SKCM (B), BLCA (C), and progression free survival (PFS) in CHOL (D), GBM (E), KIRC (F).

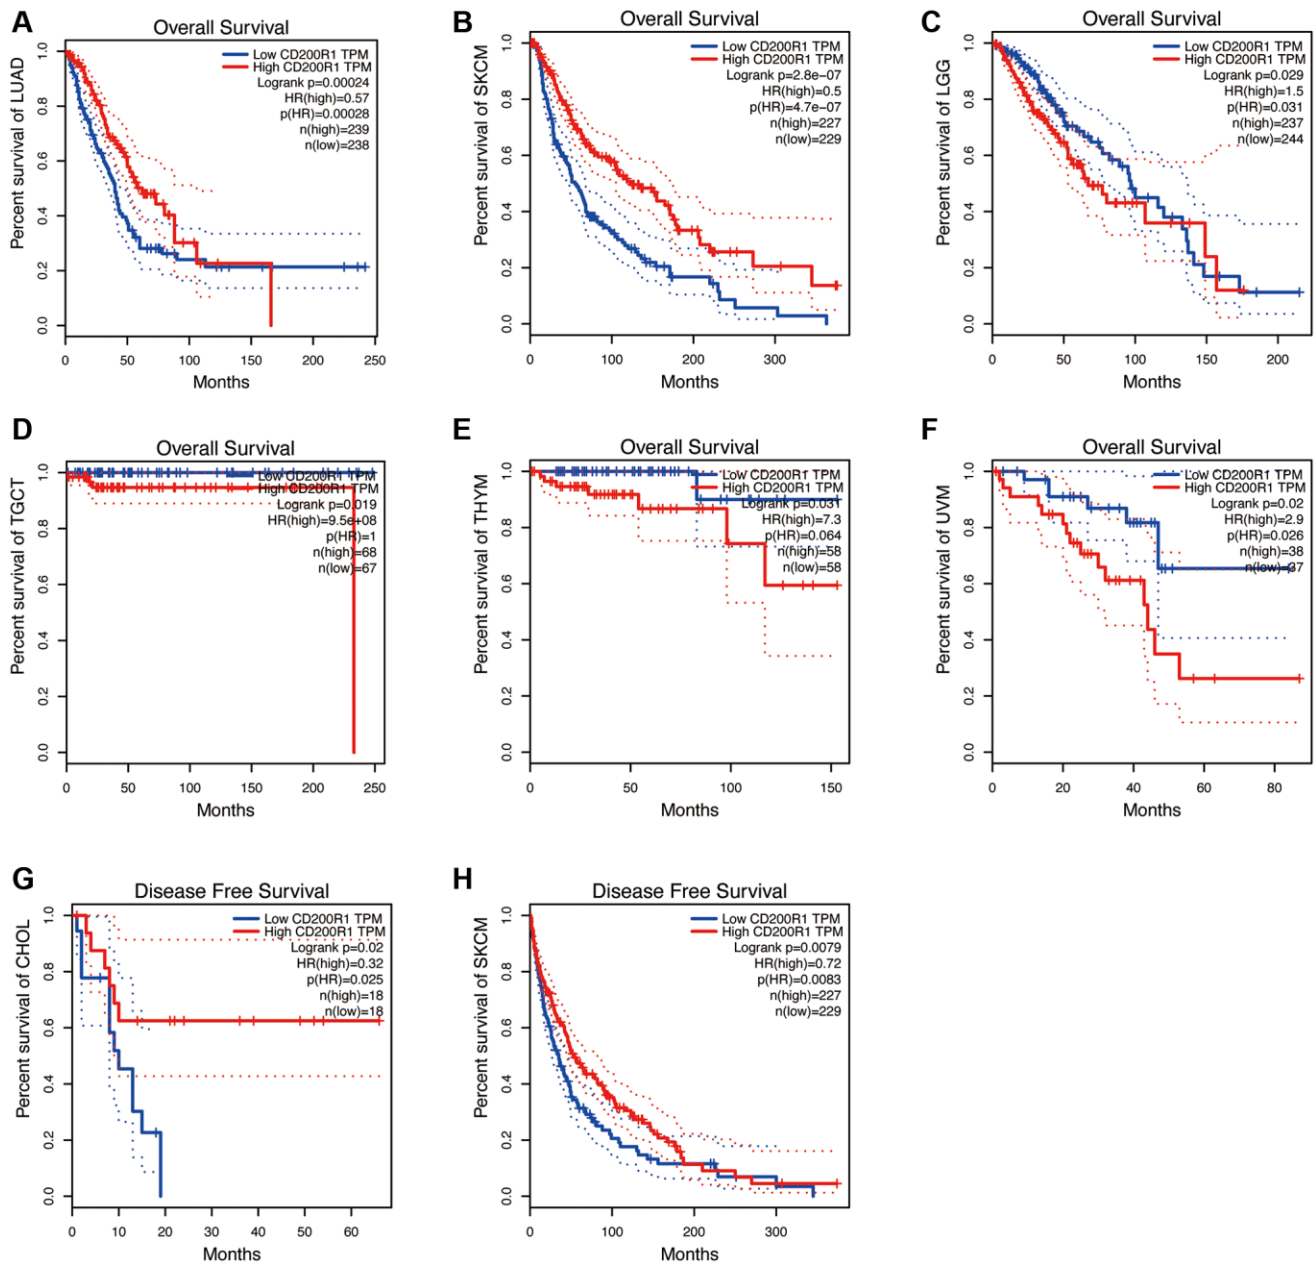

**Supplementary Figure 16. A significant correlation between CD200R1 expression and pan-cancer prognostic value.** Expression of CD200R1 was associated with overall survival (OS) in LUAD (A), SKCM (B), LGG (C), TGCT (D), THYM (E), UVM (F), and progression free survival (PFS) in CHOL (G), SKCM (H).

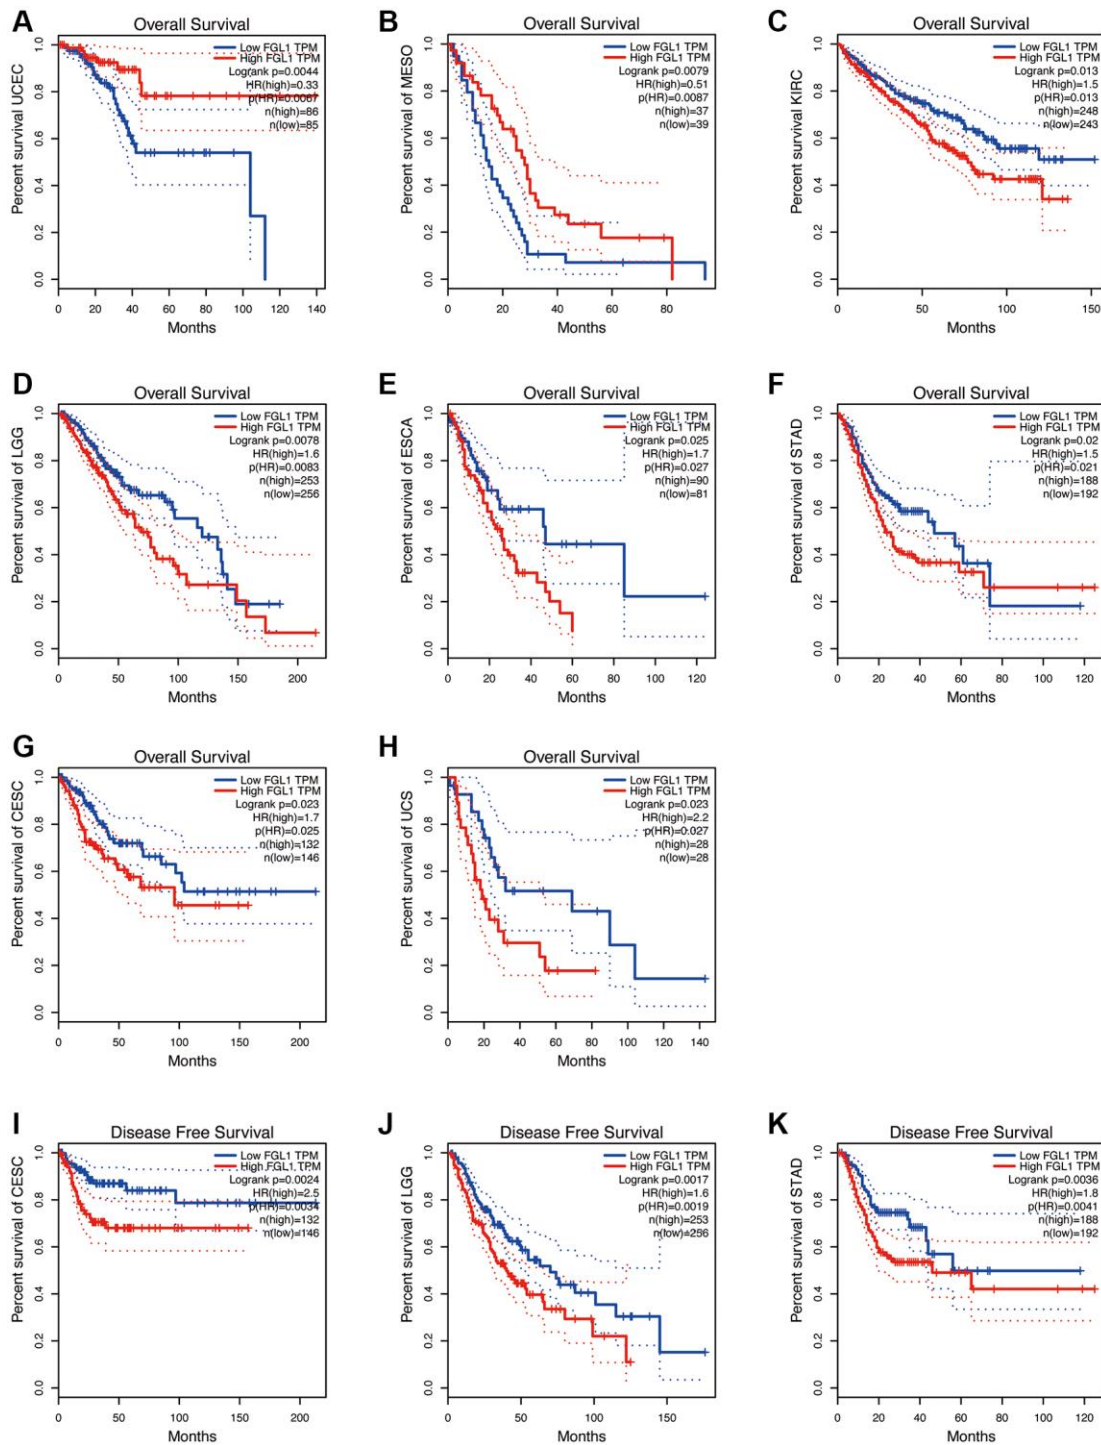

**Supplementary Figure 17. A significant correlation between FGL1 expression and pan-cancer prognostic value.** Expression of FGL1 was associated with overall survival (OS) in UCEC (A), MESO (B), KIRC (C), LGG (D), ESCA (E), STAD (F), CESC (G), UCS (H), and progression free survival (PFS) in CESC (I), LGG (J), STAD (K).

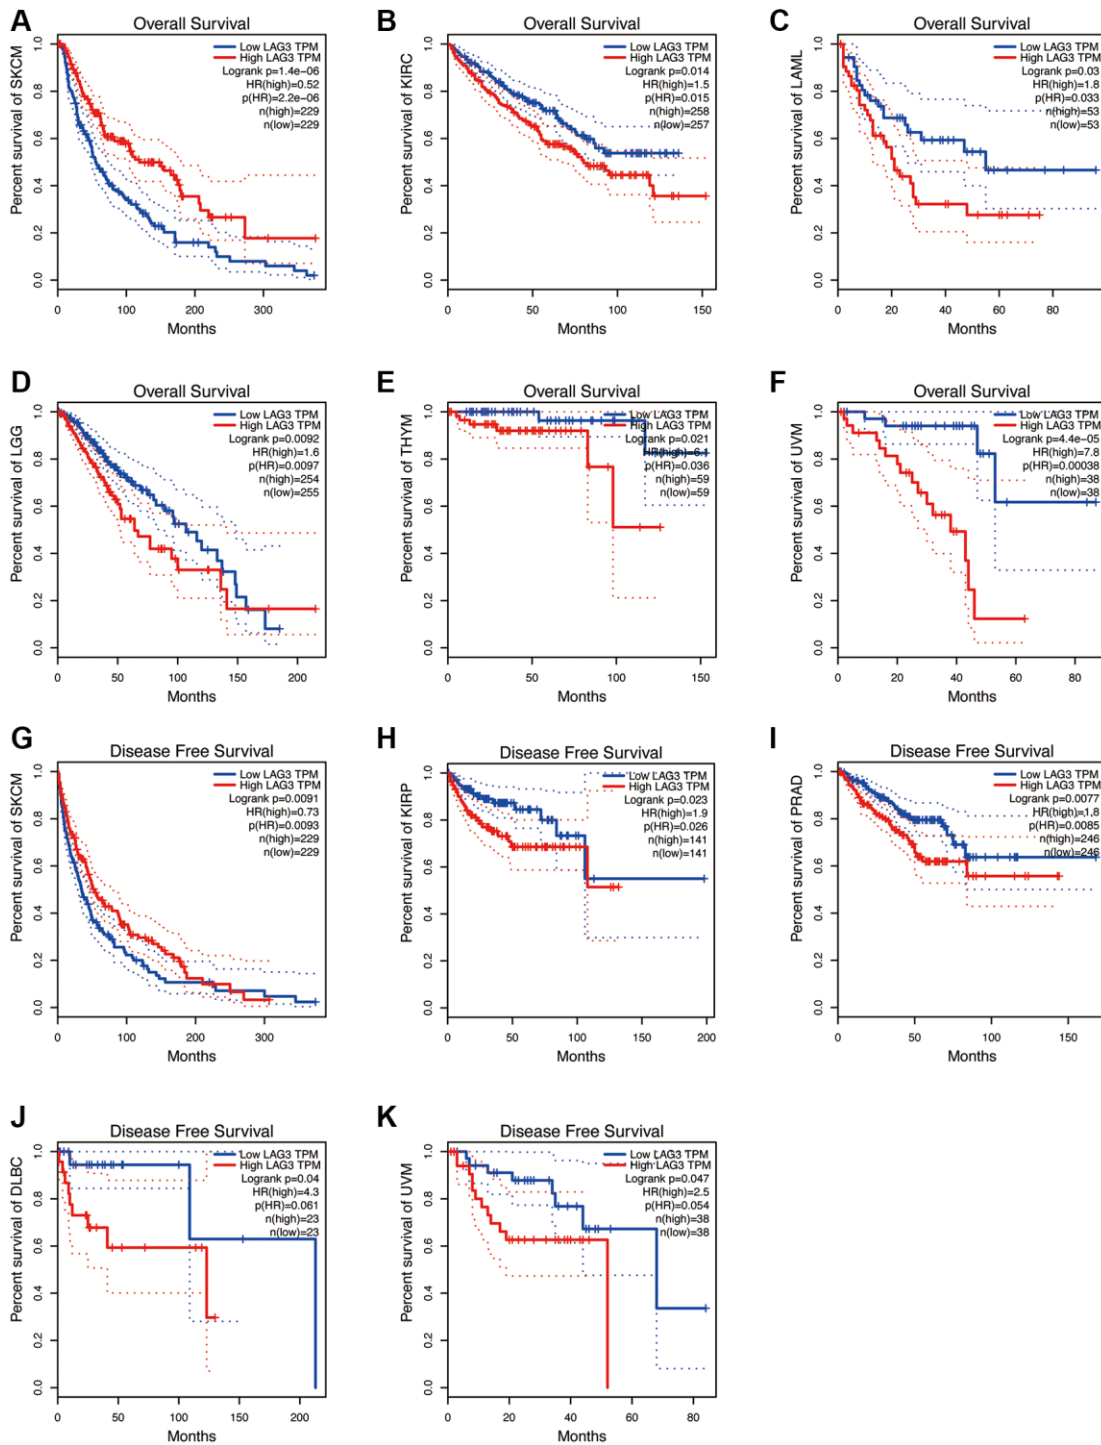

**Supplementary Figure 18. A significant correlation between LAG3 expression and pan-cancer prognostic value.** Expression of LAG3 was associated with overall survival (OS) in SKCM (A), KIRC (B), LAML (C), LGG (D), THYM (E), UVM (F), and progression free survival (PFS) in SKCM (G), KIRC (H), PRAD (I), DLBC (J), UVM (K).



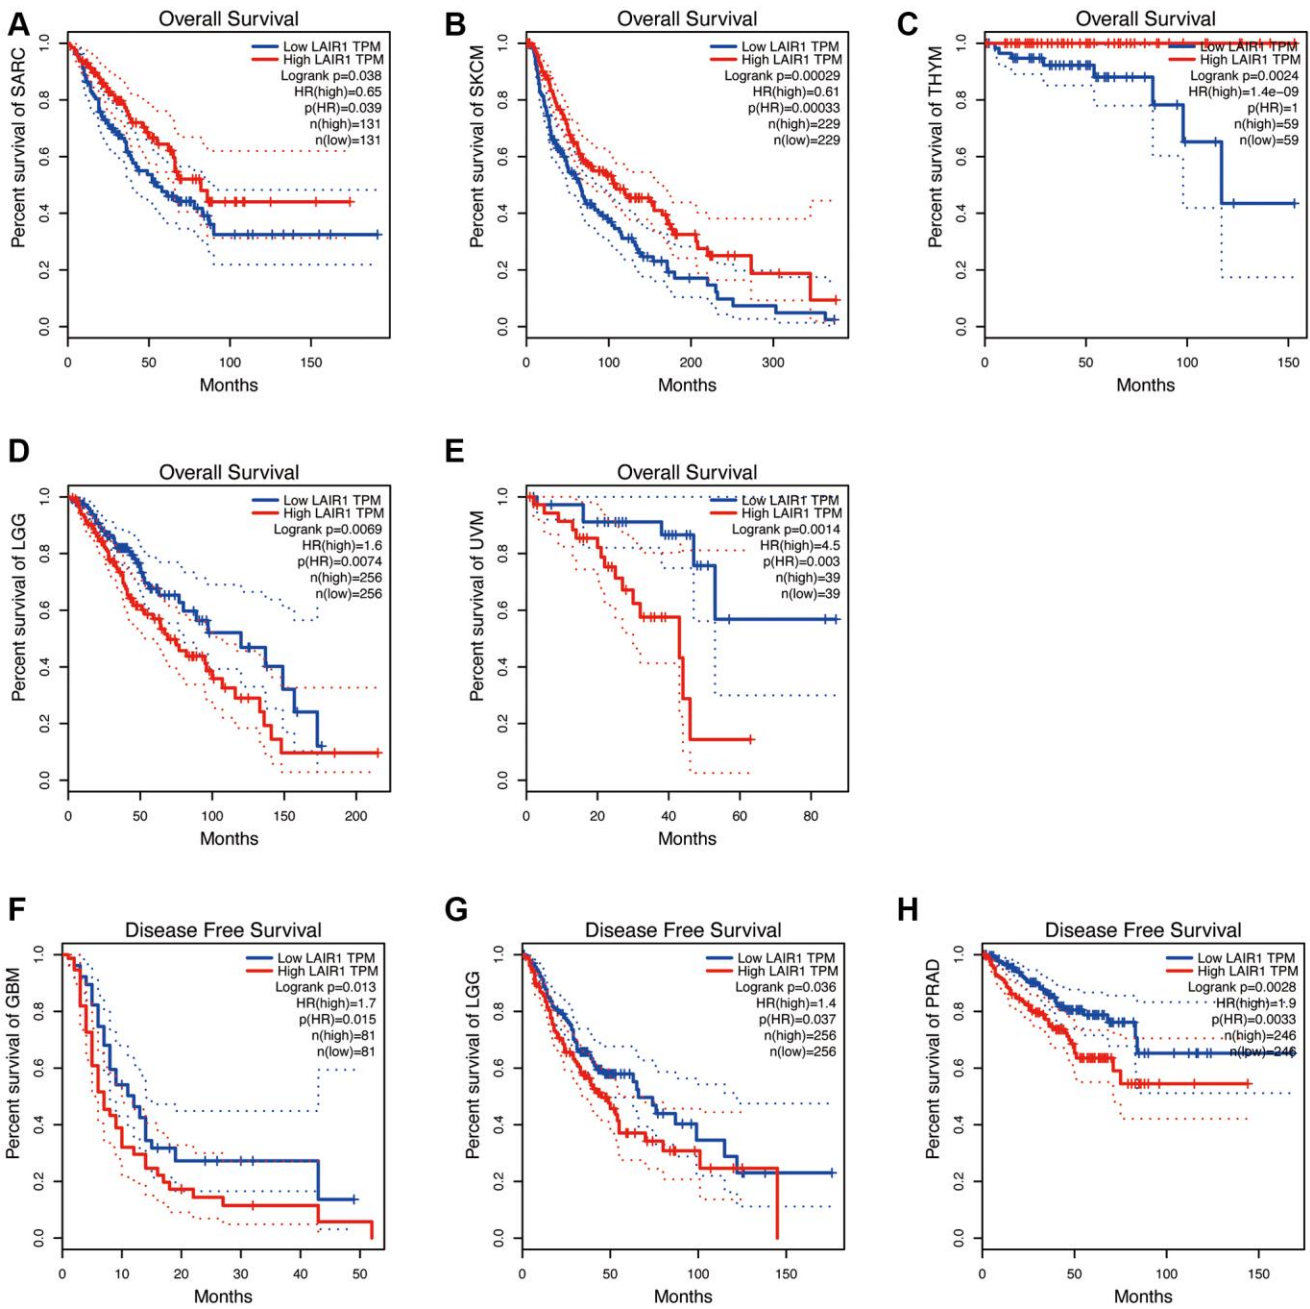

**Supplementary Figure 19. A significant correlation between LAIR1 expression and pan-cancer prognostic value.** Expression of LAIR1 was associated with overall survival (OS) in SARC (A), SKCM (B), THYM (C), LGG (D), UVM (E), and progression free survival (PFS) in GBM (F), LGG (G), PRAD (H).

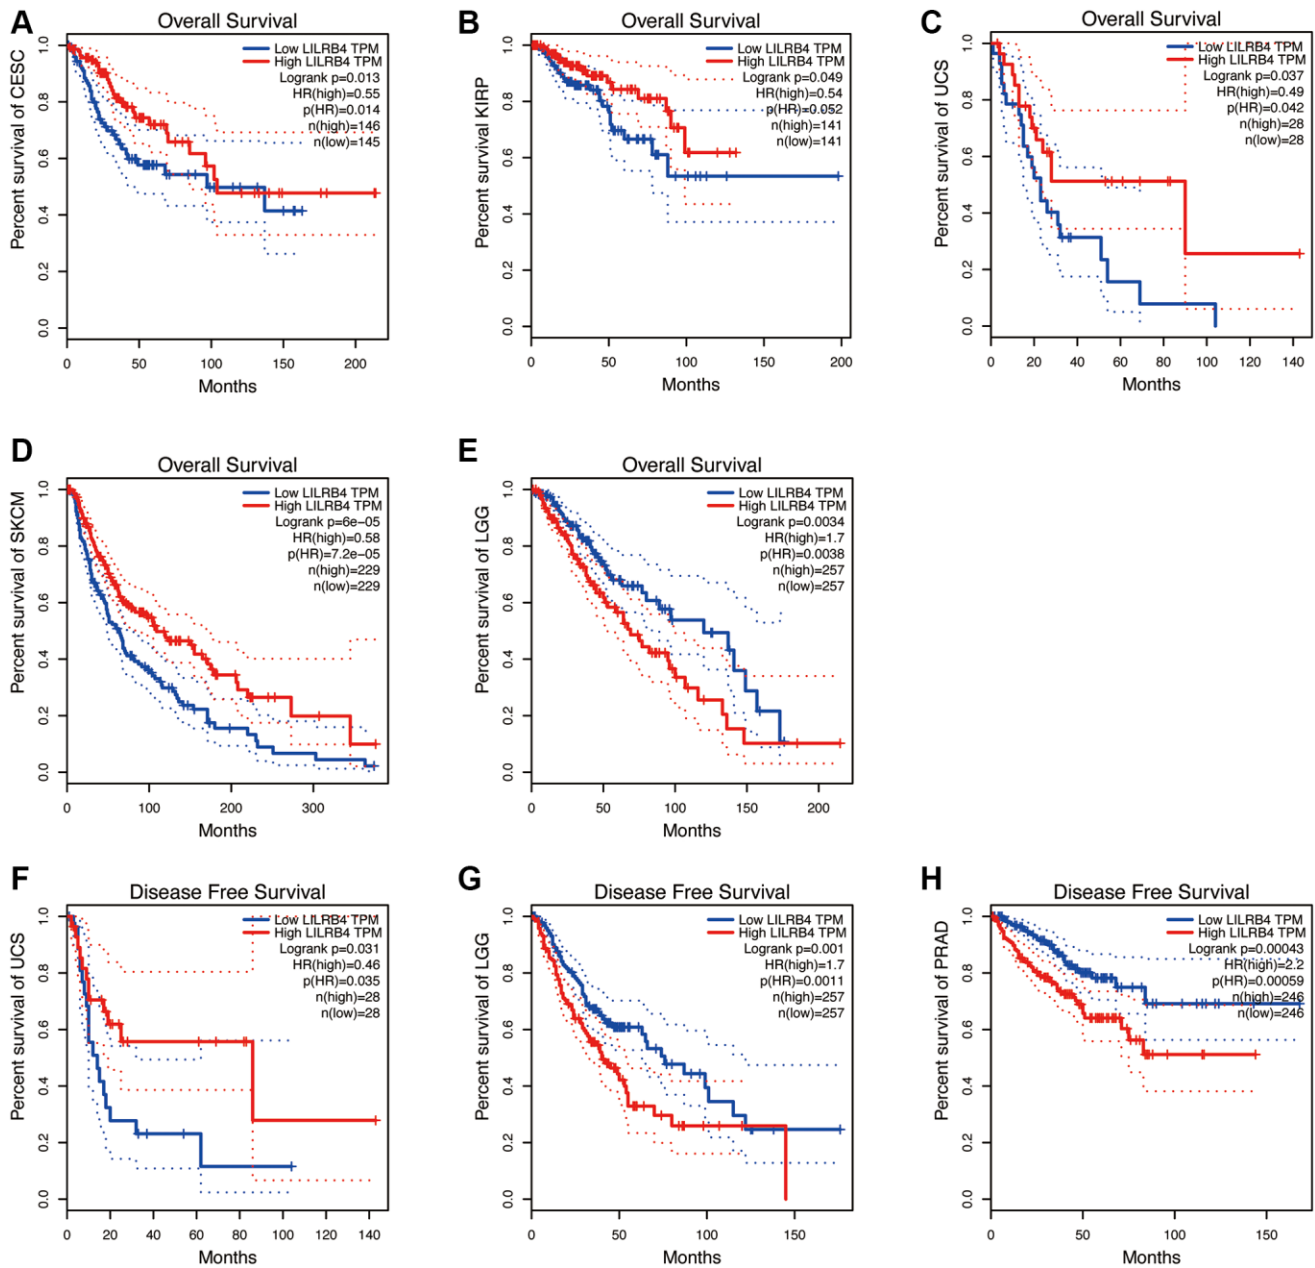

**Supplementary Figure 20. A significant correlation between LILRB4 expression and pan-cancer prognostic value.** Expression of LILRB4 was associated with overall survival (OS) in CESC (A), KIRP (B), UCS (C), SKCM (D), LGG (E), and progression free survival (PFS) in UCS (F), LGG (G), PRAD (H).
